# Supplementary material for: Grit
Source: Atypon-hosted journal article supplement (doi:10.1027/1015-5759/a000424), 2017-08-01
Supplement: 1015-5759_a000424_esm1.pdf [file 1015-5759_a000424_esm1.pdf]

## Item Category Statistics

| Item number                      | Category | Observed |    | Step difficulty estimate | Error | Weighted MNSQ | Correlation |
|----------------------------------|----------|----------|----|--------------------------|-------|---------------|-------------|
|                                  |          | Count    | %  |                          |       |               |             |
| Consistence of interest subscale |          |          |    |                          |       |               |             |
| 1                                | 1        | 49       | 2  |                          |       | 0.98          | -.27        |
|                                  | 2        | 352      | 16 | -2.51                    | .06   | 0.99          | -.36        |
|                                  | 3        | 647      | 29 | -0.69                    | .05   | 0.99          | -.18        |
|                                  | 4        | 913      | 40 | -0.08                    | .06   | 0.98          | .23         |
|                                  | 5        | 299      | 13 | 1.63                     |       | 0.98          | .41         |
| 3                                | 1        | 131      | 6  |                          |       | 0.97          | -.31        |
|                                  | 2        | 749      | 33 | -1.71                    | .07   | 1.02          | -.31        |
|                                  | 3        | 750      | 33 | -0.24                    | .05   | 1.01          | .05         |
|                                  | 4        | 510      | 23 | 0.49                     | .05   | 1.02          | .28         |
|                                  | 5        | 115      | 5  | 2.58                     |       | 0.99          | .35         |
| 5                                | 1        | 232      | 10 |                          |       | 0.97          | -.31        |
|                                  | 2        | 763      | 34 | -1.48                    | .06   | 1.05          | -.26        |
|                                  | 3        | 668      | 30 | 0.32                     | .05   | 1.01          | .06         |
|                                  | 4        | 499      | 22 | 0.81                     | .05   | 1.04          | .31         |
|                                  | 5        | 89       | 4  | 2.47                     |       | 1.05          | .33         |
| 7                                | 1        | 298      | 13 |                          |       | 0.94          | -.41        |
|                                  | 2        | 664      | 29 | -1.00                    | .05   | 1.01          | -.25        |
|                                  | 3        | 576      | 26 | 0.21                     | .04   | 1.01          | .02         |
|                                  | 4        | 521      | 23 | 0.48                     | .05   | 1.02          | .29         |
|                                  | 5        | 196      | 9  | 1.75                     |       | 0.99          | .44         |
| 8                                | 1        | 46       | 2  |                          |       | 0.97          | -.26        |
|                                  | 2        | 301      | 13 | -2.27                    | .05   | 1.00          | -.31        |
|                                  | 3        | 623      | 28 | -1.02                    | .05   | 1.00          | -.19        |
|                                  | 4        | 832      | 37 | -0.25                    | .07   | 1.03          | .12         |
|                                  | 5        | 450      | 20 | 1.25                     |       | 1.02          | .42         |
| 9                                | 1        | 64       | 3  |                          |       | 0.91          | -.35        |
|                                  | 2        | 439      | 20 | -2.21                    | .06   | 0.97          | -.38        |
|                                  | 3        | 724      | 32 | -0.73                    | .05   | 0.97          | -.14        |
|                                  | 4        | 762      | 34 | 0.06                     | .06   | 0.99          | .27         |
|                                  | 5        | 260      | 12 | 1.83                     |       | 0.93          | .46         |
| 10                               | 1        | 129      | 6  |                          |       | 1.01          | -.31        |
|                                  | 2        | 453      | 20 | -1.66                    | .06   | 0.99          | -.26        |
|                                  | 3        | 857      | 38 | -0.58                    | .05   | 1.01          | -.09        |
|                                  | 4        | 592      | 27 | 0.76                     | .06   | 1.02          | .26         |
|                                  | 5        | 200      | 9  | 1.72                     |       | 1.01          | .36         |
| Perseverance of effort subscale  |          |          |    |                          |       |               |             |
| 2                                | 1        | 116      | 5  |                          |       | 1.09          | -.35        |
|                                  | 2        | 632      | 28 | -2.11                    | .08   | 1.06          | -.40        |
|                                  | 3        | 988      | 44 | 0.07                     | .05   | 1.03          | .06         |
|                                  | 4        | 433      | 19 | 2.28                     | .06   | 1.06          | .37         |
|                                  | 5        | 88       | 4  | 4.05                     |       | 0.89          | .42         |
| 4                                | 1        | 40       | 2  |                          |       | 1.07          | -.28        |
|                                  | 2        | 287      | 13 | -2.91                    | .06   | 1.08          | -.41        |
|                                  | 3        | 590      | 26 | -0.82                    | .05   | 1.02          | -.27        |
|                                  | 4        | 868      | 38 | 0.33                     | .05   | 1.02          | .16         |

(Continued on next page)

(Continued)

| Item number | Category | Observed |    | Step difficulty estimate | Error | Weighted MNSQ | Correlation |
|-------------|----------|----------|----|--------------------------|-------|---------------|-------------|
|             |          | Count    | %  |                          |       |               |             |
| 6           | 5        | 470      | 21 | 2.25                     |       | 1.05          | .54         |
|             | 1        | 37       | 2  |                          |       | 1.06          | -.28        |
|             | 2        | 318      | 14 | -3.05                    | .07   | 1.03          | -.42        |
|             | 3        | 694      | 31 | -0.79                    | .05   | 1.02          | -.23        |
|             | 4        | 904      | 40 | 0.59                     | .05   | 1.02          | .22         |
| 11          | 5        | 299      | 13 | 2.93                     |       | 0.96          | .53         |
|             | 1        | 33       | 1  |                          |       | 1.13          | -.28        |
|             | 2        | 250      | 11 | -3.01                    | .067  | 1.04          | -.40        |
|             | 3        | 758      | 34 | -1.19                    | .052  | 0.96          | -.34        |
|             | 4        | 896      | 40 | 0.65                     | .046  | 0.97          | .26         |
| 12          | 5        | 298      | 13 | 2.91                     |       | 0.90          | .56         |
|             | 1        | 18       | 1  |                          |       | 1.18          | -.24        |
|             | 2        | 174      | 8  | -3.45                    | .06   | 0.99          | -.40        |
|             | 3        | 710      | 32 | -1.64                    | .05   | 0.98          | -.40        |
|             | 4        | 935      | 42 | 0.4                      | .05   | 0.96          | .19         |
|             | 5        | 397      | 18 | 2.52                     |       | 0.91          | .58         |
